# Supplementary material for: Establishing a New Platform to Investigate the Efficacy of Oncolytic Virotherapy in a Human Ex Vivo Peritoneal Carcinomatosis Model
Source: MDPI journal article supplement (doi:10.3390/v15020363), 2023-01-27
Supplement: s1 [file s1]

**A**

GLV-0b347

(Vaccinia Western Reserve)

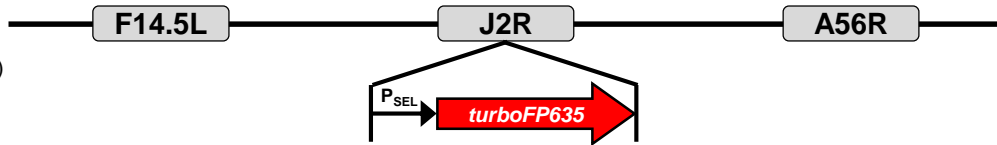**B**

MeV-DsRed

(Measles Vaccine Virus)

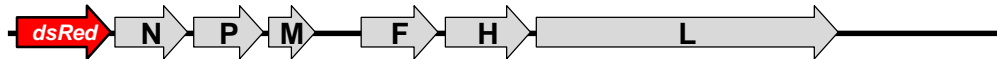

**Figure S1. Schematic structure of the used oncolytic viruses.** (A) The structure of the oncolytic vaccinia virus GLV-0b347 contains the red fluorescent marker gene for turboFP635 in the gene locus J2R under control of an early-late promotor. (B) The measles vaccine virus MeV-DsRed contains the gene for the red fluorescent protein dsRed inserted before the N protein.
