# Supplementary material for: Establishing a New Platform to Investigate the Efficacy of Oncolytic Virotherapy in a Human Ex Vivo Peritoneal Carcinomatosis Model
Source: MDPI journal article supplement (doi:10.3390/v15020363), 2023-01-27
Supplement: s1 [file s1]

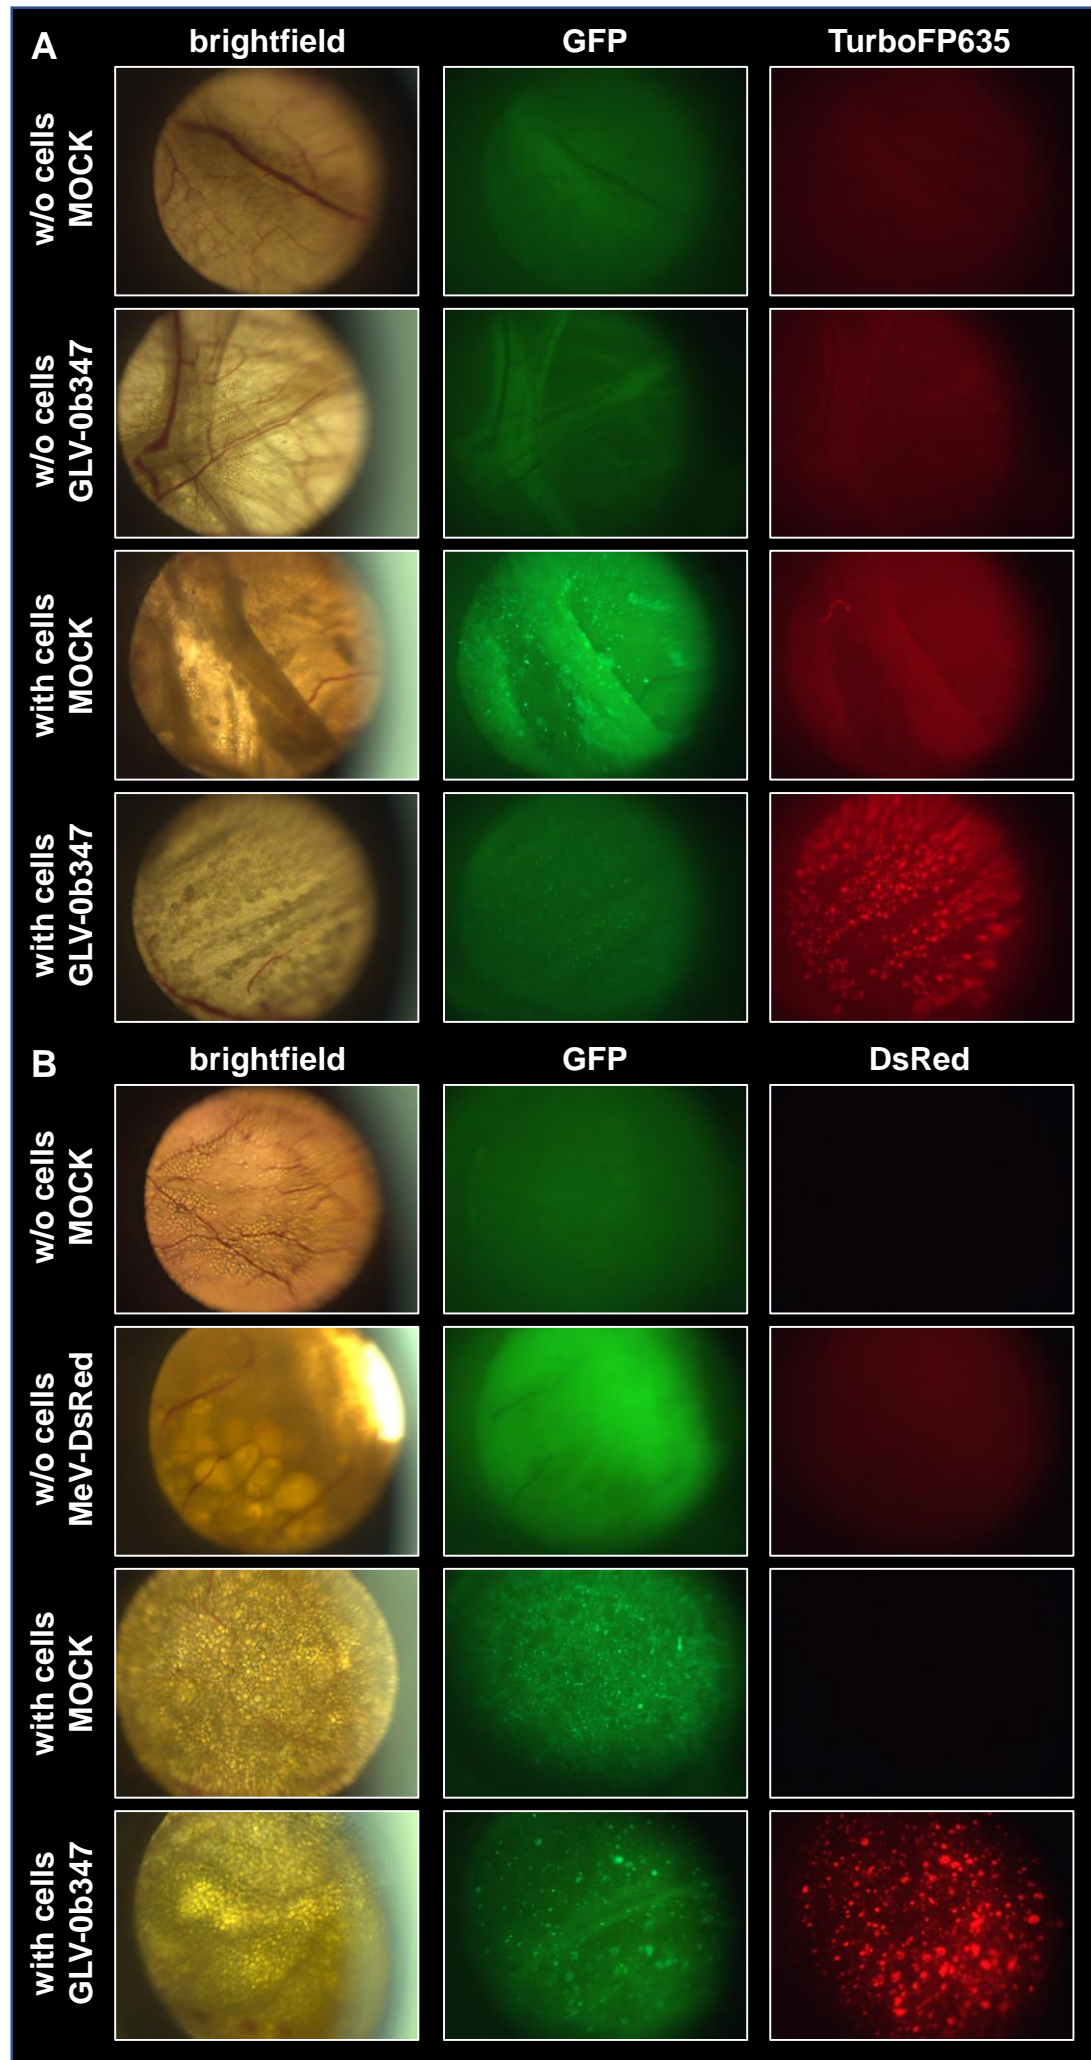

**Figure S2. Selective virotherapeutic infection of tumor cells in PC models. (A)** Fluorescence images of ex-vivo peritoneal models 7 days post-infection (dpi) with GLV-0b347 ( $1.5 \times 10^7$  PFU (plaque forming units) consisting of all controls including peritoneum of NON-cancer patients without (w/o) tumor cells as well as peritoneum with tumor cells, each infected and MOCK infected. **(B)** Fluorescence images of co-cultures 7 days post-infection (dpi) with MeV-DsRed ( $1.5 \times 10^7$  PFU (plaque forming units) consisting of all controls including peritoneum of NON-cancer patients without (w/o) tumor cells as well as peritoneum with tumor cells, each infected and MOCK infected. Original magnification 4x.
